# Supplementary material for: Magnetic resonance imaging features of tumor and lymph node to predict clinical outcome in node-positive cervical cancer: a retrospective analysis
Source: PubMed Central journal article supplement (PMC7171757; doi:10.1186/s13014-020-01502-w), 2020-04-20
Supplement: 13014_2020_1502_MOESM1_ESM.pdf [file 13014_2020_1502_MOESM1_ESM.pdf]

Supplementary Table 1. Summary of imaging features.

| Imaging feature <sup>1</sup>                                                                 | Formula                                                                                                                    |
|----------------------------------------------------------------------------------------------|----------------------------------------------------------------------------------------------------------------------------|
| <b>First-order features</b>                                                                  |                                                                                                                            |
| Mean ( $\mu$ ): average intensity values in an image                                         | $\sum_i ip(i)$                                                                                                             |
| Standard deviation: the spread or variation around the mean                                  | $\sqrt{\sum_i (i - \mu)^2 p(i)}$                                                                                           |
| Minimum: minimal intensity values in an image                                                |                                                                                                                            |
| Maximum: maximal intensity values in an image                                                |                                                                                                                            |
| Skewness: asymmetry of the grey-level distribution in the histogram.                         | $\frac{\frac{1}{E} \sum_i (HISTO(i) - \overline{HISTO})^3}{(\sqrt{\frac{1}{E} \sum_i (HISTO(i) - \overline{HISTO})^2})^3}$ |
| Kurtosis: shape of the grey-level distribution                                               | $\frac{\frac{1}{E} \sum_i (HISTO(i) - \overline{HISTO})^4}{(\frac{1}{E} \sum_i (HISTO(i) - \overline{HISTO})^2)^2}$        |
| Entropy: randomness of the distribution                                                      | $-\sum_i p(i) \cdot \log_{10}(p(i) + \varepsilon)$                                                                         |
| Energy: uniformity of the distribution                                                       | $\sum_i p(i)^2$                                                                                                            |
| Sphericity: how spherical a volume of interest is.                                           | $\frac{A}{\pi^{1/3} \cdot (6V)^{2/3}}$                                                                                     |
| Compacity: how compact the Volume of Interest is.                                            | $\frac{A}{A^{3/2}}$                                                                                                        |
| Volume (mL and voxels)                                                                       | $\sum_i V_i$                                                                                                               |
| <b>Grey-level Co-occurrence Matrix (GLCM) features<sup>2</sup></b>                           |                                                                                                                            |
| GLCM_homogeneity: homogeneity of grey-level voxel pairs                                      | Average over 13 directions<br>$(\sum_i \sum_j \frac{GLCM(i,j)}{1+ i-j })$                                                  |
| GLCM_Energy: uniformity of grey-level voxel pairs                                            | Average over 13 directions<br>$(\sum_i \sum_j GLCM(i,j)^2)$                                                                |
| GLCM_Contrast: local variations in the GLCM                                                  | Average over 13 directions<br>$(\sum_i \sum_j (i,j)^2 \cdot GLCM(i,j))$                                                    |
| GLCM_Correlation: linear dependency of grey-levels in GLCM                                   | Average over 13 directions<br>$(\sum_i \sum_j \frac{(i-\mu_i) \cdot (j-\mu_j) \cdot GLCM(i,j)^2}{\sigma_i \sigma_j})$      |
| GLCM_Entropy: randomness of grey-level voxel pairs                                           | Average over 13 directions<br>$(-\sum_i \sum_j GLCM(i,j) \cdot \log_{10}(GLCM(i,j) + \varepsilon))$                        |
| GLCM_Dissimilarity: variation of grey-level voxel pairs                                      | $\sum_i \sum_j  i-j  \cdot GLCM(i,j)$                                                                                      |
| <b>Grey-level Run-Length Matrix (GLRLM) features*</b>                                        |                                                                                                                            |
| GLRLM_Short-Run Emphasis (GLRLM_SRE): distribution of the short homogeneous runs in an image | Average over 13 directions<br>$(\frac{1}{H} (\sum_i \sum_j \frac{GLRLM(i,j)}{j^2}))$                                       |

|                                                                                                                         |                                                                                                                                                   |
|-------------------------------------------------------------------------------------------------------------------------|---------------------------------------------------------------------------------------------------------------------------------------------------|
| GLRLM_Long-Run Emphasis (GLRLM_LRE): distribution of the long homogeneous runs in an image                              | Average over 13 directions<br>$(\frac{1}{H} (\sum_i \sum_j GLRLM(i, j) \cdot j^2))$                                                               |
| GLRLM_Low Grey-level Run Emphasis (GLRLM_LGRE): distribution of the low grey-level runs                                 | Average over 13 directions<br>$(\frac{1}{H} (\sum_i \sum_j \frac{GLRLM(i, j)}{i^2}))$                                                             |
| GLRLM_High Grey-level Run Emphasis (GLRLM_HGRE): distribution of the high grey-level runs                               | Average over 13 directions<br>$(\frac{1}{H} (\sum_i \sum_j GLRLM(i, j) \cdot i^2))$                                                               |
| GLRLM_Short-run Low Grey-level Emphasis (GLRLM_SRLGE): distribution of the short homogeneous runs with low grey-levels  | Average over 13 directions<br>$(\frac{1}{H} (\sum_i \sum_j \frac{GLRLM(i, j)}{i^2 j^2}))$                                                         |
| GLRLM_Short-run High Grey-level Emphasis (GLRLM_SRHGE): distribution of the short homogeneous runs with low high-levels | Average over 13 directions<br>$(\frac{1}{H} (\sum_i \sum_j \frac{GLRLM(i, j) \cdot i^2}{j^2}))$                                                   |
| GLRLM_Long-run Low Grey-level Emphasis (GLRLM_LRLGE): distribution of the long homogeneous runs with low grey-levels    | Average over 13 directions<br>$(\frac{1}{H} (\sum_i \sum_j \frac{GLRLM(i, j) \cdot j^2}{i^2}))$                                                   |
| GLRLM_Long-run Low Grey-level Emphasis (GLRLM_LRHGE): distribution of the long homogeneous runs with high grey-levels   | Average over 13 directions<br>$(\frac{1}{H} (\sum_i \sum_j GLRLM(i, j) \cdot i^2 \cdot j^2))$                                                     |
| GLRLM_Grey-level Non-uniformity for Run (GLRLM_GLNUR): non-uniformity of the grey-levels                                | Average over 13 directions<br>$(\frac{1}{H} \sum_i (\sum_j GLRLM(i, j))^2)$                                                                       |
| GLRLM_Run Length Non-uniformity (GLRLM_RLNU): length of the homogeneous runs                                            | Average over 13 directions<br>$(\frac{1}{H} \sum_j (\sum_i GLRLM(i, j))^2)$                                                                       |
| GLRLM_Run Percentage (GLRLM_RP): homogeneity of the homogeneous runs                                                    | Average over 13 directions<br>$(\frac{H}{\sum_i \sum_j (j \cdot GLRLM(i, j))})$                                                                   |
| <b>Neighborhood Grey-level Difference Matrix (NGLDM) features<sup>3</sup></b>                                           |                                                                                                                                                   |
| NGLDM_Coarseness: level of spatial rate of change in intensity                                                          | $\frac{1}{\sum_i NGLDM(i, 1) \cdot NGLDM(i, 2)}$                                                                                                  |
| NGLDM_Contrast: intensity difference between neighboring regions                                                        | $\left[ \sum_i \sum_j NGLDM(i, 1) \cdot NGLDM(j, 1) \cdot (i - j)^2 \right] \cdot \frac{\sum_i NGLDM(i, 2)}{E \cdot G \cdot (G - 1)}$             |
| NGLDM_Busyness: spatial frequency of changes in intensity                                                               | $\frac{\sum_i NGLDM(i, 1) \cdot NGLDM(i, 2)}{\sum_i \sum_j (i \cdot NGLDM(i, 1) - j \cdot NGLDM(j, 1))}$ with<br>NGLDM(i, 1) ≠ 1, NGLDM(j, 1) ≠ 0 |
| <b>Grey-level Zone Length Matrix (GLZLM) features<sup>4</sup></b>                                                       |                                                                                                                                                   |
| GLZLM_Short-zone Emphasis (GLZLM_SZE): distribution of the short homogeneous zones in the image                         | $\frac{1}{H} (\sum_i \sum_j \frac{GLZLM(i, j)}{j^2})$                                                                                             |
| GLZLM_Long-zone Emphasis (GLZLM_LZE): distribution of the long homogeneous zones in the image                           | $\frac{1}{H} (\sum_i \sum_j GLZLM(i, j) \cdot j^2)$                                                                                               |
| GLZLM_Low Grey-level Zone Emphasis (GLZLM_LGZE): distribution of the low grey-level zones                               | $\frac{1}{H} (\sum_i \sum_j \frac{GLZLM(i, j)}{i^2})$                                                                                             |

|                                                                                                                                                                                                                                                                                                                                                                                                                                                                                                                                                  |                                                                              |
|--------------------------------------------------------------------------------------------------------------------------------------------------------------------------------------------------------------------------------------------------------------------------------------------------------------------------------------------------------------------------------------------------------------------------------------------------------------------------------------------------------------------------------------------------|------------------------------------------------------------------------------|
| GLZLM_High Grey-level Zone Emphasis (GLZLM_LGZE):<br>distribution of the high grey-level zones                                                                                                                                                                                                                                                                                                                                                                                                                                                   | $\frac{1}{H} \left( \sum_i \sum_j GLZLM(i, j) \cdot i^2 \right)$             |
| GLZLM_Short-zone Low Grey-level Emphasis (GLZLM_SZLGE):<br>distribution of the short homogeneous zones with low grey-levels                                                                                                                                                                                                                                                                                                                                                                                                                      | $\frac{1}{H} \left( \sum_i \sum_j \frac{GLZLM(i, j)}{i^2 \cdot j^2} \right)$ |
| GLZLM_Short-zone High Grey-level Emphasis (GLZLM_SZHGE):<br>: distribution of the long homogeneous zones with low grey-levels                                                                                                                                                                                                                                                                                                                                                                                                                    | $\frac{1}{H} \left( \sum_i \sum_j \frac{GLZLM(i, j) \cdot i^2}{j^2} \right)$ |
| GLZLM_Long-zone Low Grey-level Emphasis (GLZLM_LZLGE):<br>distribution of the long homogeneous zones with low grey-levels                                                                                                                                                                                                                                                                                                                                                                                                                        | $\frac{1}{H} \left( \sum_i \sum_j \frac{GLZLM(i, j) \cdot j^2}{i^2} \right)$ |
| GLZLM_Long-zone High Grey-level Emphasis (GLZLM_LZHGE):<br>: distribution of the long homogeneous zones with high grey-levels                                                                                                                                                                                                                                                                                                                                                                                                                    | $\frac{1}{H} \left( \sum_i \sum_j GLZLM(i, j) \cdot i^2 \cdot j^2 \right)$   |
| GLZLM_Grey-level Non-uniformity for Zone (GLZLM_GLNUz):<br>: non-uniformity of the grey-levels                                                                                                                                                                                                                                                                                                                                                                                                                                                   | $\frac{1}{H} \sum_i \left( \sum_j GLZLM(i, j) \right)^2$                     |
| GLZLM_Zone Length Non-uniformity (GLZLM_ZLNU): length of the<br>homogeneous zones                                                                                                                                                                                                                                                                                                                                                                                                                                                                | $\frac{1}{H} \sum_j \left( \sum_i GLZLM(i, j) \right)^2$                     |
| GLZLM_Zone Percentage (GLZLM_ZP): homogeneity of the<br>homogeneous zones                                                                                                                                                                                                                                                                                                                                                                                                                                                                        | $\frac{H}{\sum_i \sum_j (j \cdot GLZLM(i, j))}$                              |
| <p>*H, the number of homogeneous runs in ROI;<br/> †H, the number of homogeneous zones in ROI;<br/> V, volume of region of interest (ROI) ; A, surface of ROI; <math>V_i</math>, volume of voxel <math>i</math> of ROI; E, the total number of voxels in ROI; HISTO(<math>i</math>), the number of voxels with intensity <math>i</math>; <math>\overline{HISTO}</math>, the average of grey-levels in the histogram; <math>P(i)</math>, probability of occurrence of voxels with intensity <math>i</math>; <math>\varepsilon = 2e-16</math>;</p> |                                                                              |

## References

1. Nioche C, Orhac F, Boughdad S, et al. Lifex: A freeware for radiomic feature calculation in multimodality imaging to accelerate advances in the characterization of tumor heterogeneity. *Cancer Research* 2018;canres.0125.2018.
2. Haralick RM, Shanmugam K. Textural features for image classification. *IEEE Transactions on systems, man, and cybernetics* 1973:610-621.
3. Amadasun M, King R. Textural features corresponding to textural properties. *IEEE Transactions on Systems, Man, and Cybernetics* 1989;19:1264-1274.
4. Xu D-H, Kurani AS, Furst JD, et al. Run-length encoding for volumetric texture. *Heart* 2004;27:452-458.
