# Supplementary material for: Magnetic resonance imaging features of tumor and lymph node to predict clinical outcome in node-positive cervical cancer: a retrospective analysis
Source: PubMed Central journal article supplement (PMC7171757; doi:10.1186/s13014-020-01502-w), 2020-04-20
Supplement: 13014_2020_1502_MOESM2_ESM.pdf [file 13014_2020_1502_MOESM2_ESM.pdf]

Supplementary Table 3. Univariate analysis of potential prognostic factors for overall survival in the validation dataset

| Variables                                                                                                        |                    | n  | 5-year OS (%) | <i>P</i> value |
|------------------------------------------------------------------------------------------------------------------|--------------------|----|---------------|----------------|
| Imaging feature-based survival risk score <sup>1</sup>                                                           | <2.6               | 17 | 80.0          | 0.569          |
|                                                                                                                  | ≥2.6               | 15 | 93.8          |                |
| Age                                                                                                              | <50                | 15 | 92.3          | 0.592          |
|                                                                                                                  | ≥50                | 17 | 100.0         |                |
| Pathology                                                                                                        | SCC                | 30 | 91.5          | 0.882          |
|                                                                                                                  | Non-SCC            | 2  | 100.0         |                |
| FIGO stage <sup>2</sup>                                                                                          | IIB                | 25 | 86.1          | 0.729          |
|                                                                                                                  | IIIA, IIIB         | 7  | 100.0         |                |
| Extent of nodal involvement                                                                                      | Pelvic only        | 25 | 88.4          | 0.779          |
|                                                                                                                  | Pelvic+para-aortic | 7  | 83.3          |                |
| Primary tumor size (mm)                                                                                          | <50                | 16 | 90.9          | 1.000          |
|                                                                                                                  | ≥50                | 16 | 83.9          |                |
| Abbreviations: RC = regional control; HR = hazard ratio; CI = confidence interval; SCC = squamous cell carcinoma |                    |    |               |                |
| <sup>1</sup> Imaging features of involved lymph nodes                                                            |                    |    |               |                |
| <sup>2</sup> The 2009 International Federation of Gynecology and Obstetrics (FIGO) staging system                |                    |    |               |                |
